# Supplementary material for: Multicolor polymeric carbon dots: synthesis, separation and polyamide-supported molecular fluorescence
Source: Royal Society of Chemistry journal article supplement (doi:10.1039/d0sc05743f), 2020-12-22
Supplement: d0sc05743f1.pdf [file d0sc05743f1.pdf]

## Supporting Information

# Multicolor polymeric carbon dots: synthesis, separation and polyamide-supported molecular fluorescence

Bo Zhi,<sup>1,2†</sup> Xiaoxiao Yao,<sup>1†</sup> Meng Wu,<sup>3</sup> Arielle Mensch,<sup>4</sup> Yi Cui,<sup>4,5</sup> Jiahua Deng,<sup>6</sup> Juan J Duchimaza-Heredia,<sup>6</sup> Kasidet Jing Trerayapiwat,<sup>6</sup> Thomas Niehaus,<sup>7</sup> Yoshio Nishimoto,<sup>8</sup> Benjamin P. Frank,<sup>9</sup> Yongqian Zhang,<sup>10</sup> Riley E. Lewis,<sup>1</sup> Elaine A. Kappel,<sup>1</sup> Robert J. Hamers,<sup>10</sup> Howard D. Fairbrother,<sup>9</sup> Galya Orr,<sup>4</sup> Catherine J. Murphy,<sup>3</sup> Qiang Cui,<sup>6,11</sup> and Christy L. Haynes<sup>1\*</sup>

1 Department of Chemistry, University of Minnesota-Twin Cities, 207 Pleasant Street SE, Minneapolis, Minnesota 55455, United States

2 Current address: Advanced Performance Material Lab, Research and Development Center, ZEON Corporation, Kanagawa 210-9507, Japan

3 Department of Chemistry, University of Illinois at Urbana-Champaign, 600 South Mathews Avenue, Urbana, Illinois 61801, United States

4 Environmental Molecular Sciences Laboratory, Pacific Northwest National Laboratory, 3335 Innovation Boulevard, Richland, Washington 99352, United States

5 Current address: MIT Media Lab, Cambridge, MA 02139, United States

6 Department of Chemistry, Boston University, 590 Commonwealth Avenue, Boston, Massachusetts 02215, United States

7 Univ Lyon, Université Claude Bernard Lyon 1, CNRS, Institut Lumière Matière, F-69622 Lyon, France

8 Graduate School of Science, Kyoto University, Kyoto 606-8502, Japan

9 Department of Chemistry, Johns Hopkins University, Baltimore, MD 21218, United States

10 Department of Chemistry, University of Wisconsin-Madison, 1101 University Avenue, Madison, Wisconsin 53706, United States

11 Departments of Physics and Biomedical Engineering, Boston University, 590 Commonwealth Avenue, Boston, Massachusetts 02215, United States

† These two authors contributed equally to this work

\*Corresponding author: [chaynes@umn.edu](mailto:chaynes@umn.edu)

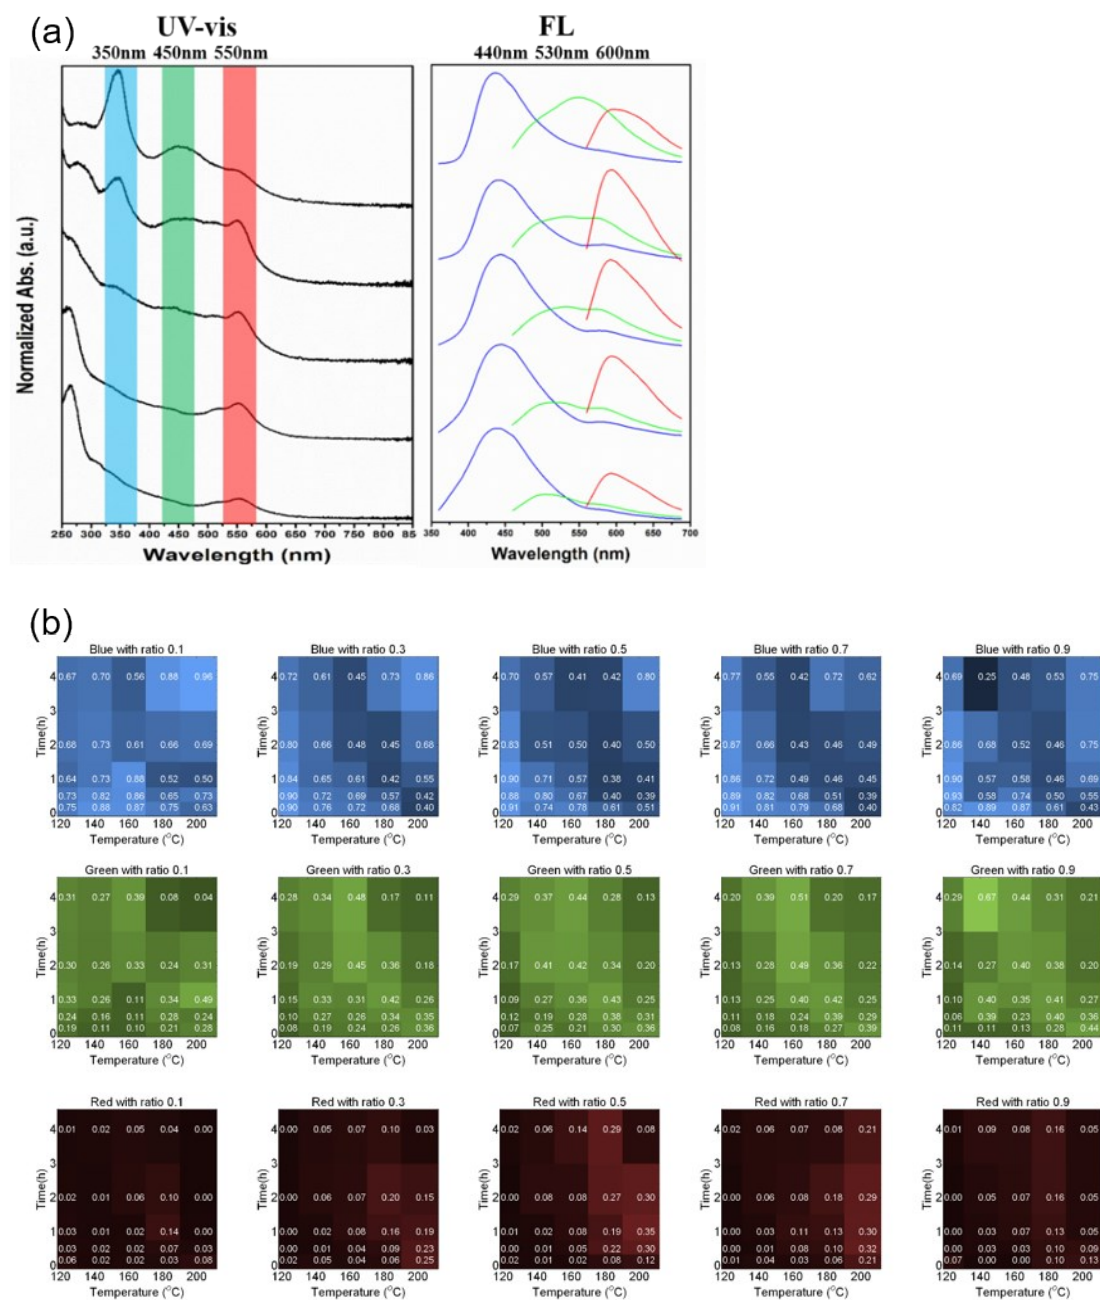

**Figure S1.** (a) A representative UV-vis (left) and fluorescence(right) spectra in the optimization of multicolor CDs synthesis. Peaks in the fluorescence spectra were integrated. (b) a summary chart showing the percentage of the integrated peak area in the blue, green, and red region of the raw products synthesized in the screening process. Citric acid to urea molar ratio was varied as 0.1, 0.3, 0.5, 0.7, and 0.9. Reaction temperature was 120 °C, 140 °C, 160 °C, 180 °C, and 200 °C. Reaction time was held to be 10 min, 30 min, 1 h, 2 h, and 4 h.

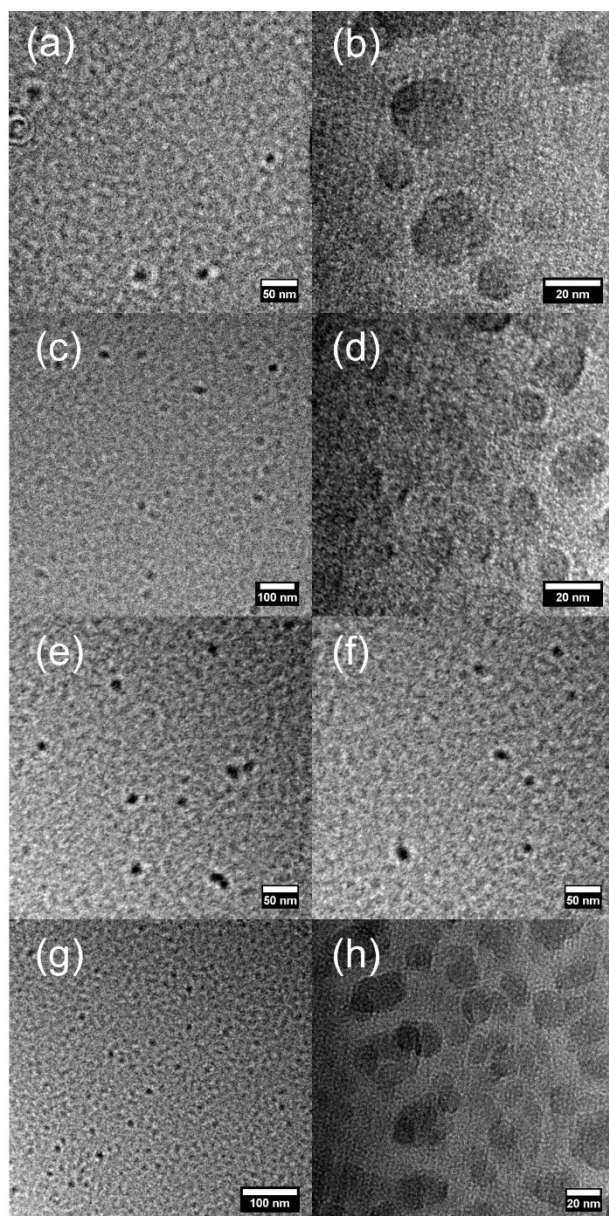

**Figure S2.** TEM images of (a)(b) as-made CDs; (c)(d) CD-B; (e)(f) CD-G; and (g)(h) CD-R.

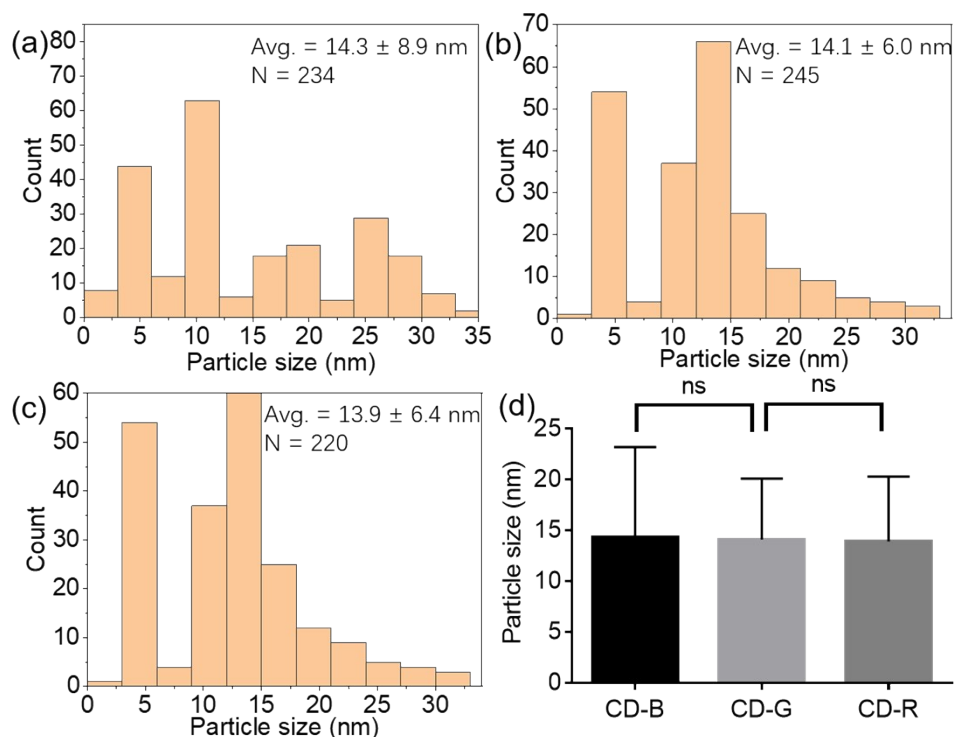

**Figure S3.** Histograms of particle sizes of (a) CD-B, (b) CD-G, and (c) CD-R, analyzed with ImageJ of TEM images. (d) One-way ANOVA analysis shows no statistical difference among CD-B, CD-G, and CD-R.

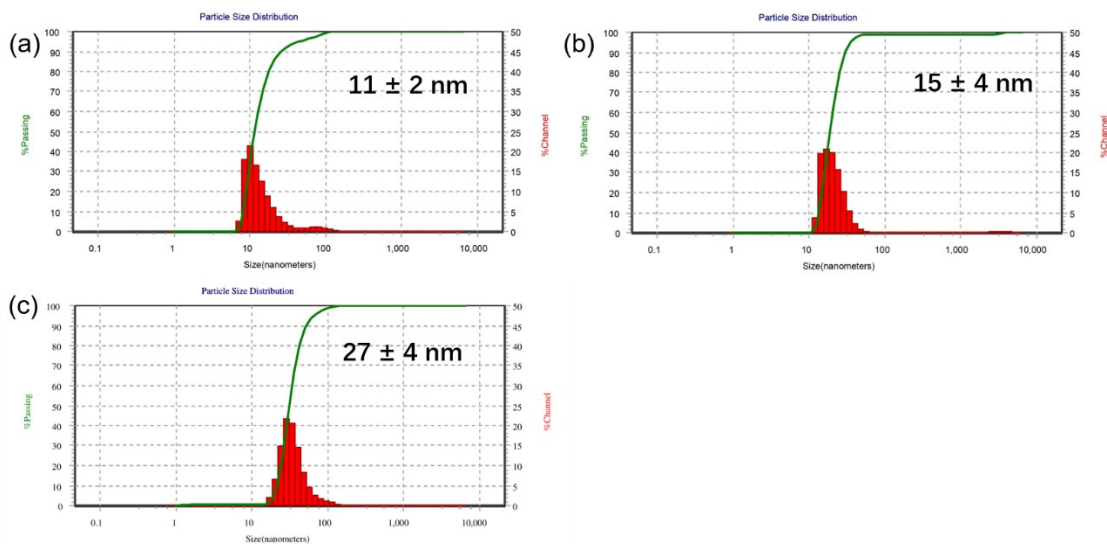

**Figure S4.** Dynamic light scattering (DLS) results of (a) CD-B, (b) CD-G, and (c) CD-R in deionized water.

The DLS sizes for CD-B, G, and R fractions are  $11 \pm 2$  nm,  $15 \pm 4$  nm, and  $27 \pm 4$  nm, respectively. These CDs tended to form aggregates, which explains the slightly higher diameter of CD-R.

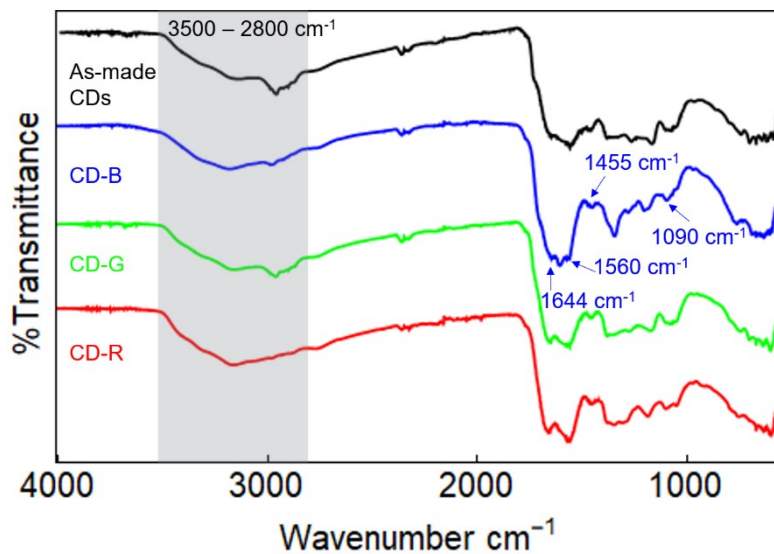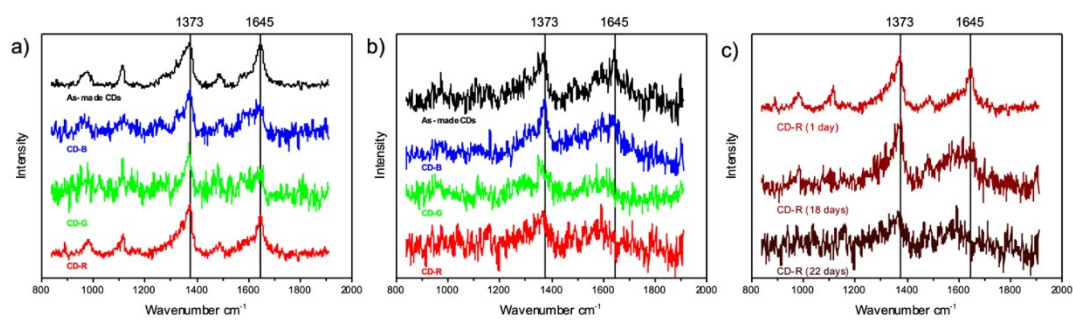

**Figure S5.** Raman spectra of as-made CDs and CD-B, CD-G, and CD-R (a) the day after synthesis and (b) 22 days after synthesis. (c) Raman spectra of CD-R at different time points after synthesis.

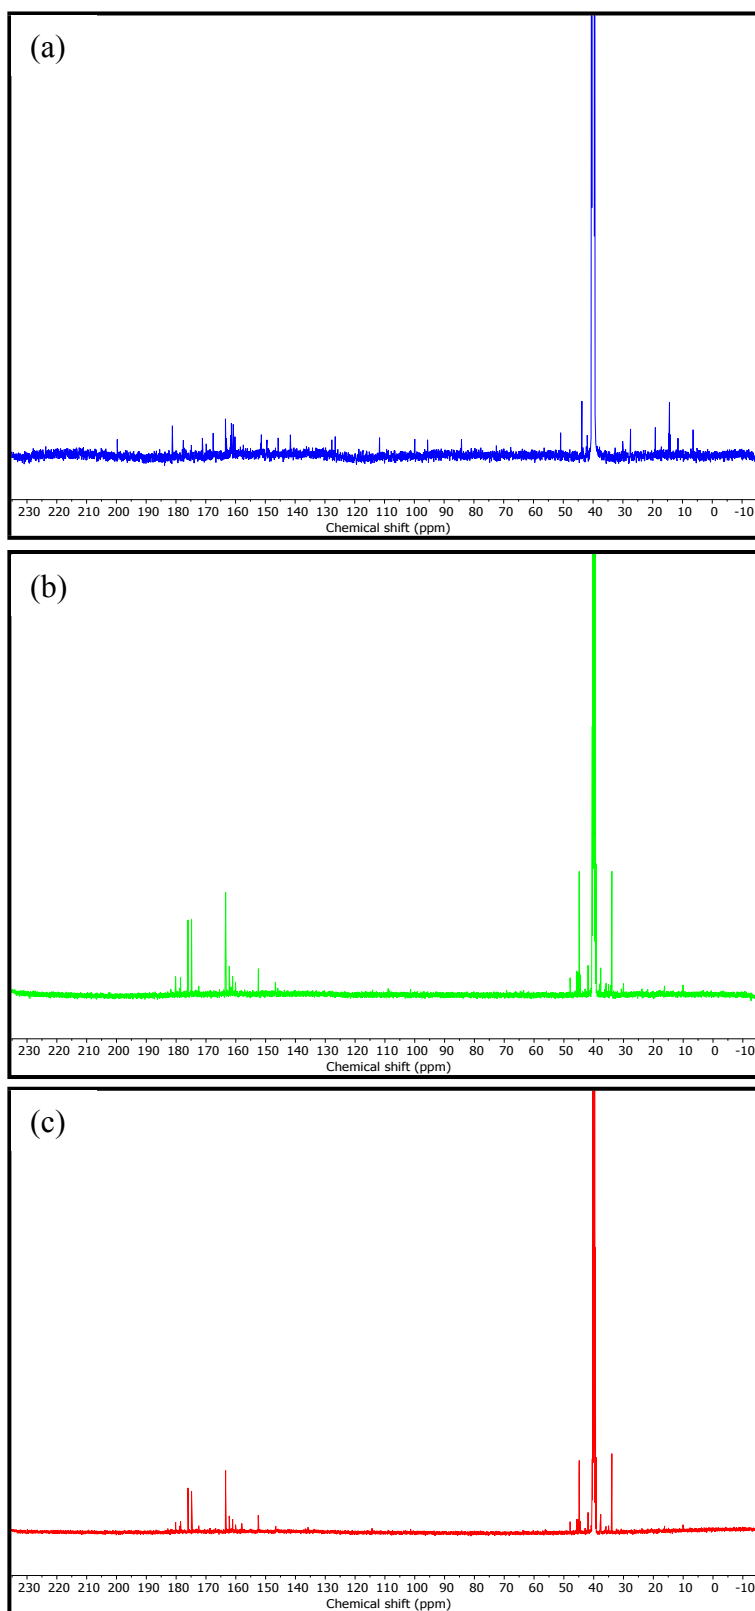

**Figure S6.**  $^{13}\text{C}$  NMR spectra of CA-B (a), CA-G (b) and CA-R (c) before dialysis in  $\text{DMSO-d}_6$ . The strong peak at 40 ppm is the solvent peak. The peaks from 0-25 ppm correspond to C in methyl and  $-\text{CH}_2\text{R}$  groups. The peaks from 25-55 ppm correspond to C in C-N and  $-\text{CHR}_2$  groups. The peaks from 50-90 ppm correspond to C in C-O groups. The peaks from 80-150 ppm correspond to C in C=C groups. The peaks beyond 150 ppm correspond to C in C=O groups.

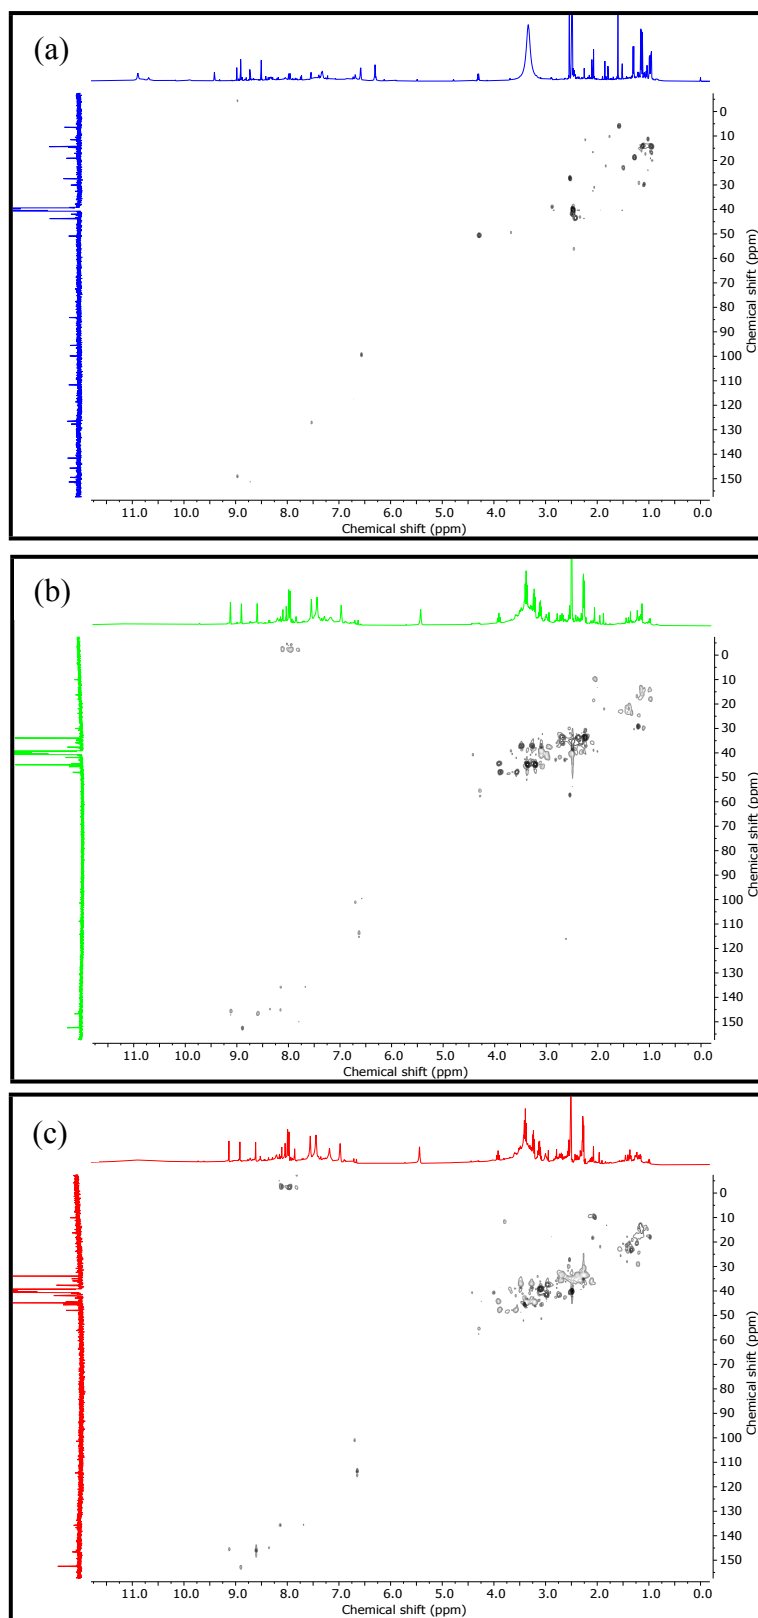

**Figure S7.**  $^1\text{H}$ - $^{13}\text{C}$  HSQC spectra of CA-B (a), CA-G (b) and CA-R (c) before dialysis in  $\text{DMSO-d}_6$ .

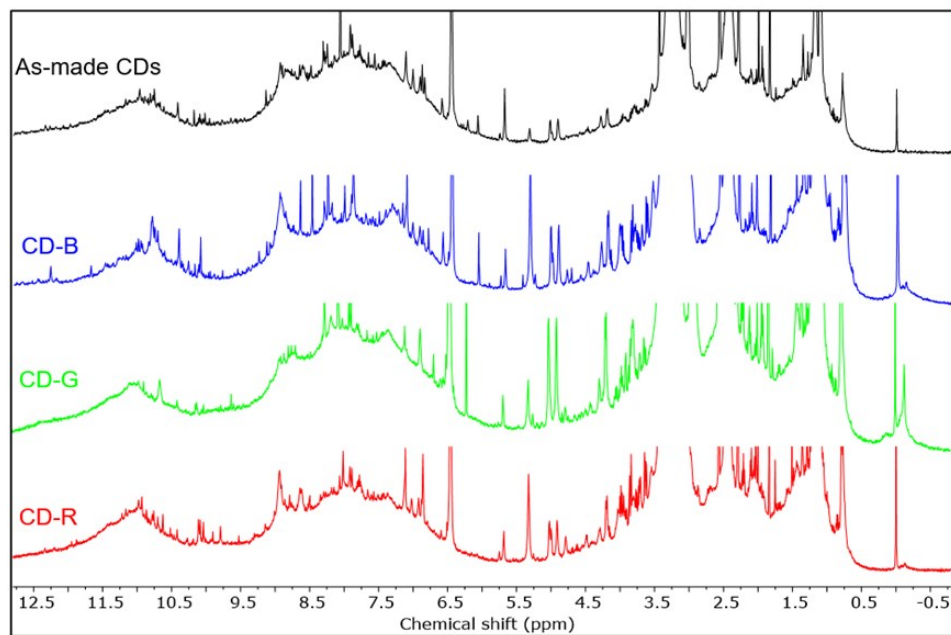

**Figure S8.** <sup>1</sup>H NMR spectra of as made CDs, CD-B, CD-G, and CD-R in DMSO-d<sub>6</sub> after dialysis (magnified from Figure 4(b)).



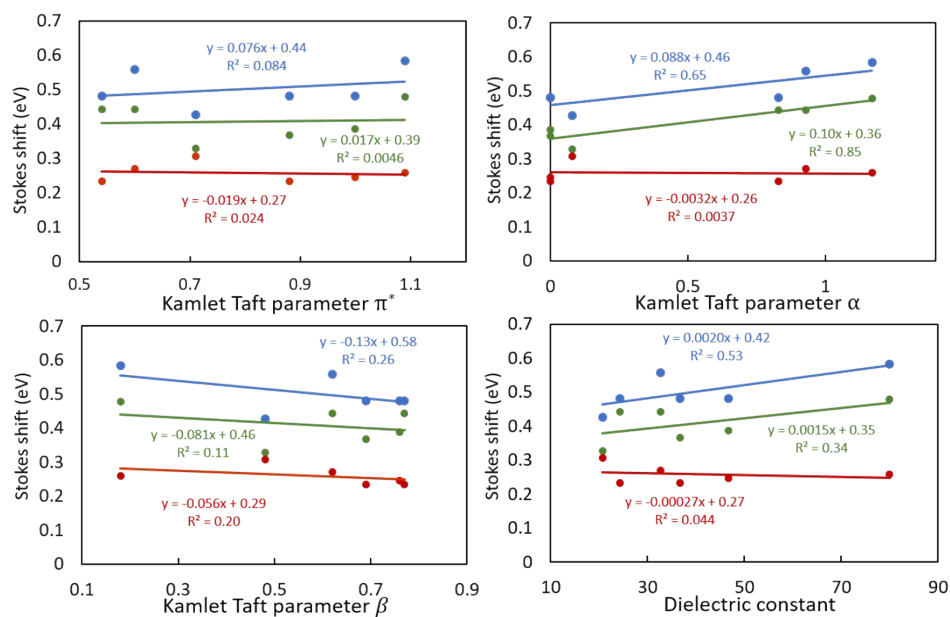

**Figure S9.** Stokes shift of CDs dispersed in acetone, DMF, DMSO, ethanol, methanol, and water against Kamlet Taft parameters  $\pi^*$ ,  $\alpha$ , and  $\beta$  and dielectric constant.

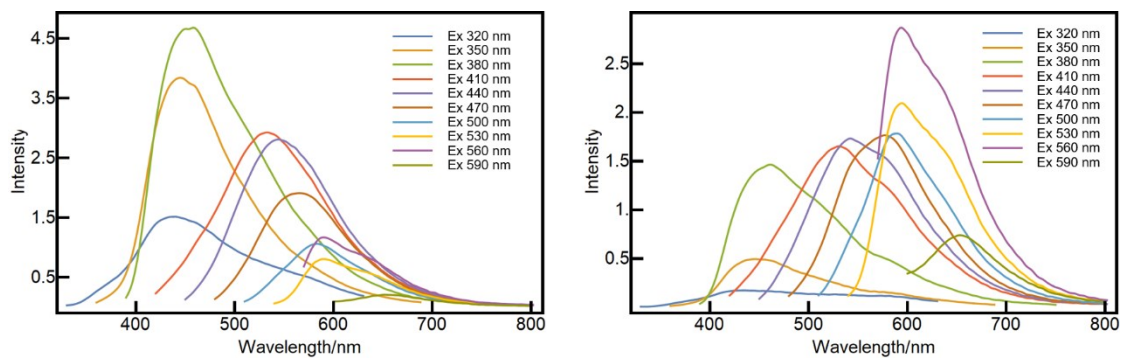

**Figure S10.** Fluorescence spectra of dialysate separated from filtered raw product through membrane 100-500 Da (left) and 3500 Da (right).

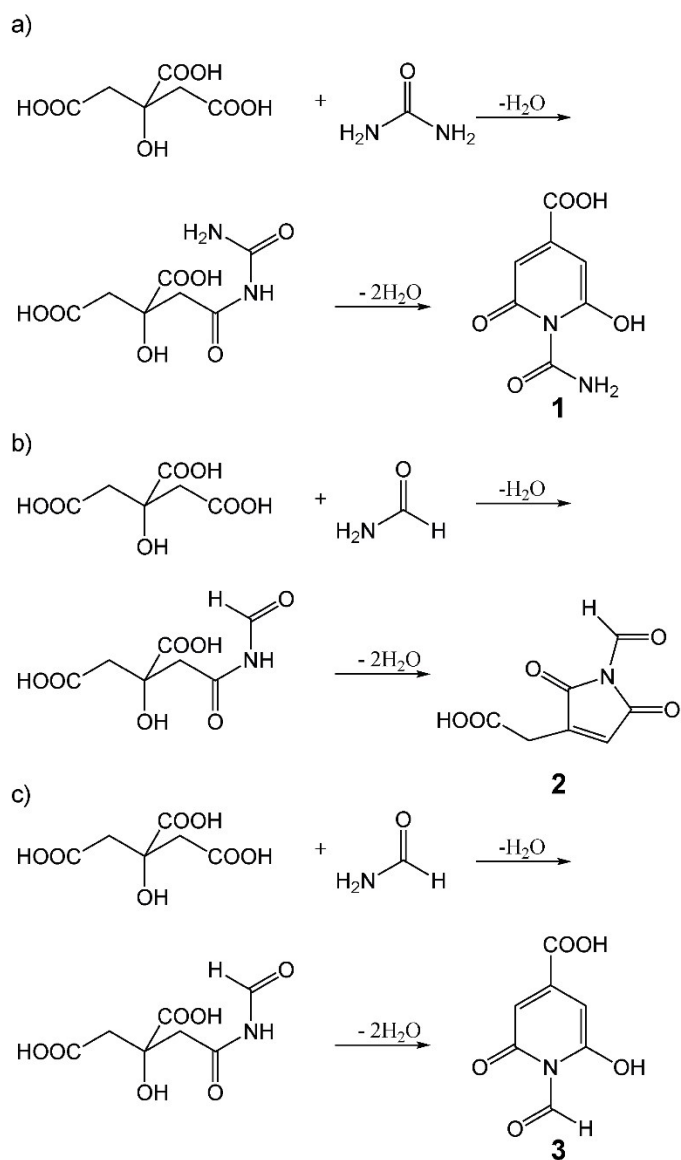

**Figure S11.** Proposed reaction pathways that lead to the formation of small molecule chromophores starting with citric acid, urea and formamide.

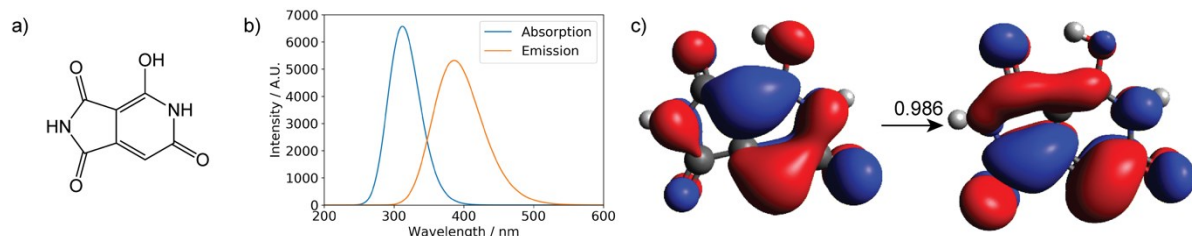

**Figure S12.** (a) Chemical structures, (b) calculated UV-Vis absorption, fluorescence spectra, and (c) natural transition orbitals of 4-hydroxy-1H-pyrrolo[3,4-c]pyridine-1,3,6(2H,5H)-trione (HPPT).

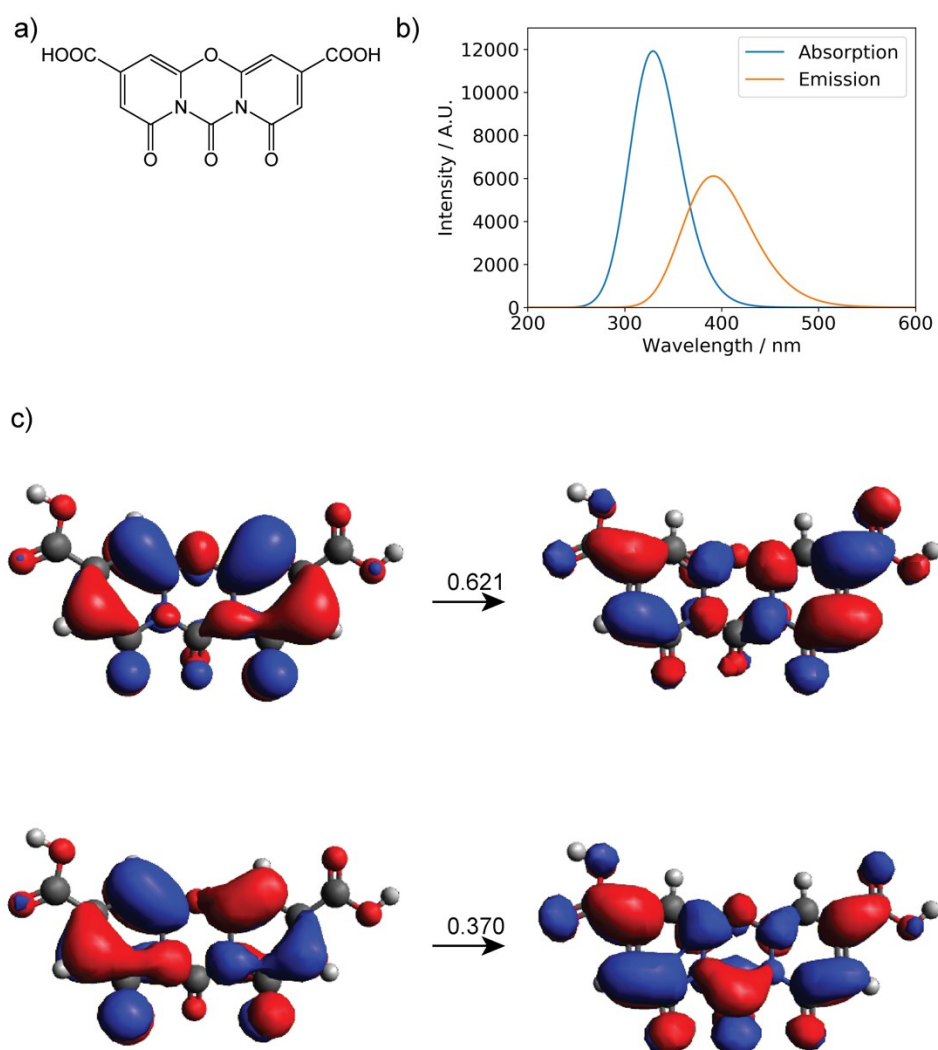

**Figure S13.** (a) Chemical structures, (b) calculated UV-Vis absorption, fluorescence spectra, and (c) natural transition orbitals of a small molecule chromophore formed from further condensation of molecule **3** in Figure S10.

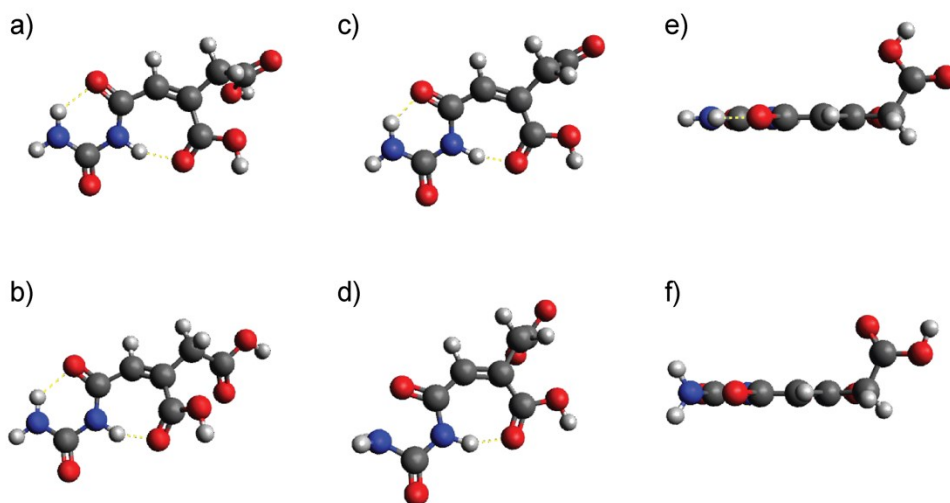

**Figure S14. Optimized structures of the dehydrated amide monomer.** (a-b) Optimized structures of the ground state, (c-d) optimized structures of the first excited state, and (e-f) the side view of the first excited state. The first row shows results at the level of B3LYP/6-31+G(d,p), and the second row shows results at the level of  $\omega$ B97XD/6-31+G(d,p). In the first excited state minimum, the orientation of the NH<sub>2</sub> group is different at the two levels of theory, and exchanging the initial structure for optimization does not change the result. As shown in Table S15, both conformers are local minima at the CAM-B3LYP level of theory.

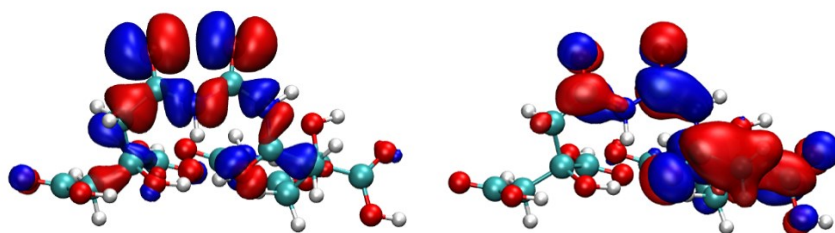

**Figure S15.** Orbitals with the leading transition coefficient (HOMO and LUMO) for the S<sub>0</sub>→S<sub>1</sub> excitation of the polyamide dimer of citric acid and urea (ID0) calculated with LC-TD-DFTB2. The leading excitation is n→ $\pi^*$  in nature. The HOMO/LUMO calculated with  $\omega$ B97XD are visually equivalent.

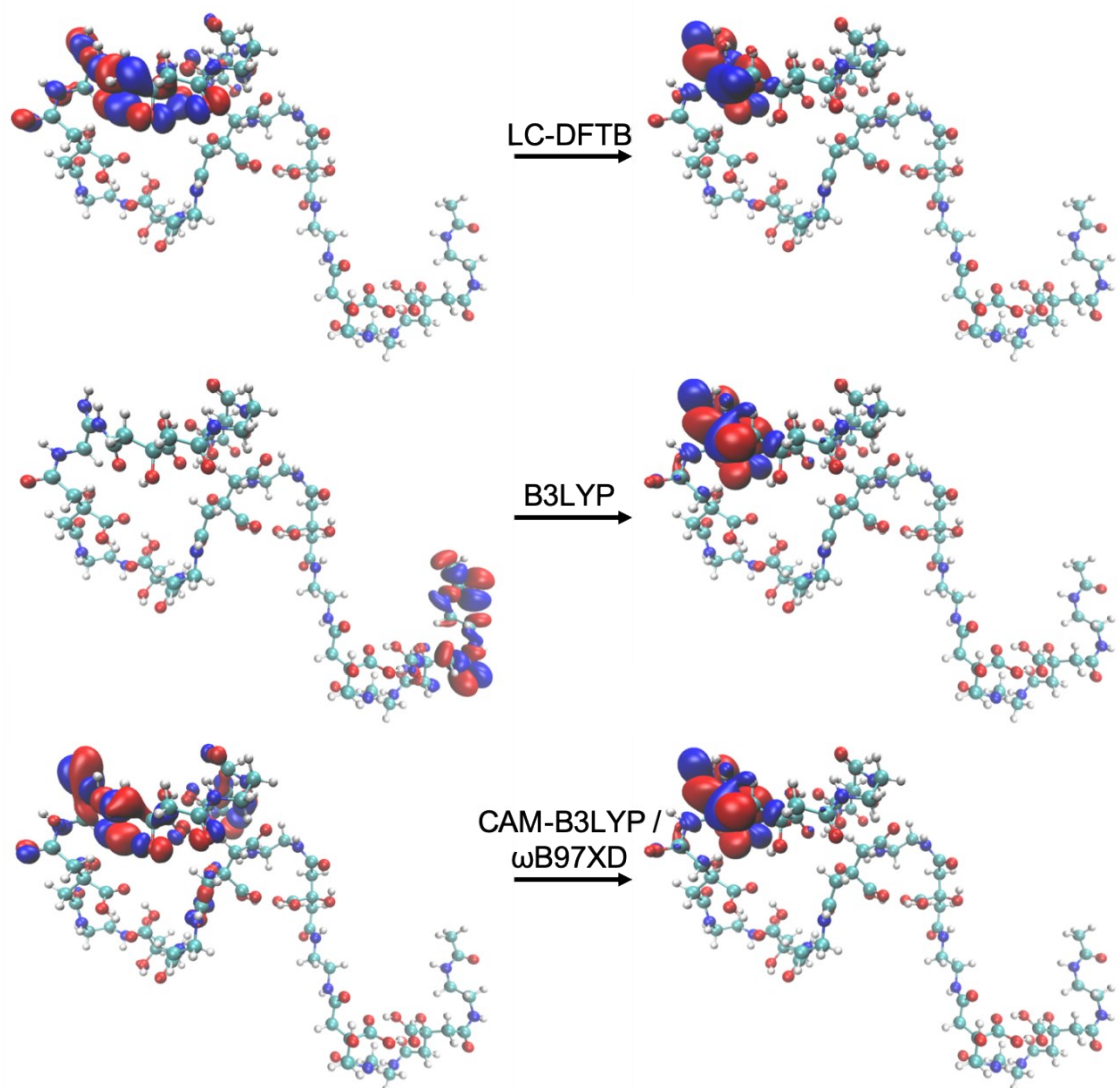

**Figure. S16.** The HOMO and LUMO orbitals for the polyamide (octamer) formed between citric acid and ethylene diamine studied in Ref. 1. Clearly, the S1 excitation at the B3LYP level is charge transfer in nature, while the nature of excitation is local when range-separation functionals are used in either TD-DFT or TD-DFTB calculations.

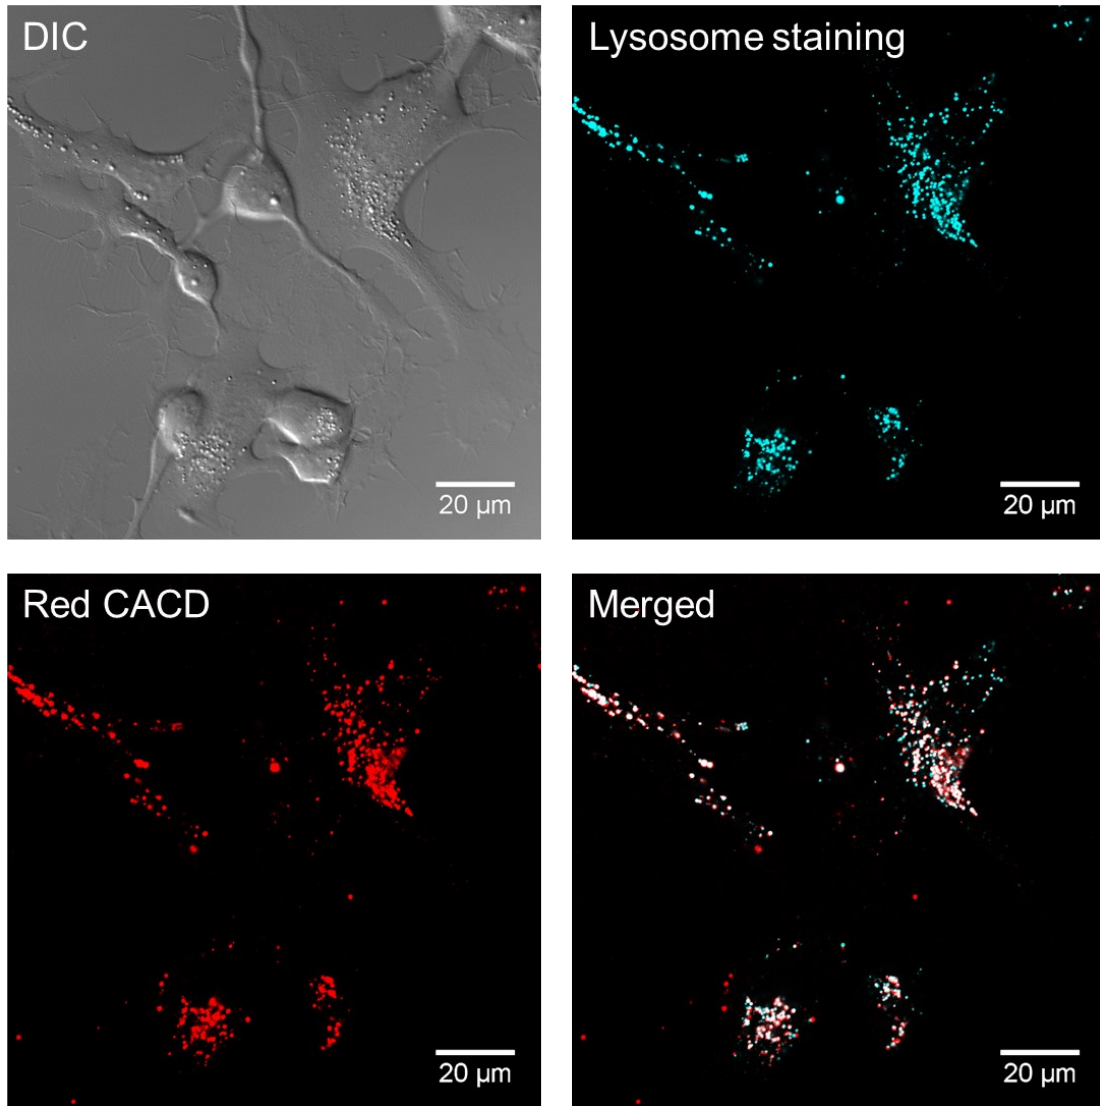

**Figure S17.** Red CDs mainly localizes in lysosomes upon uptake into trout gill epithelial cells.

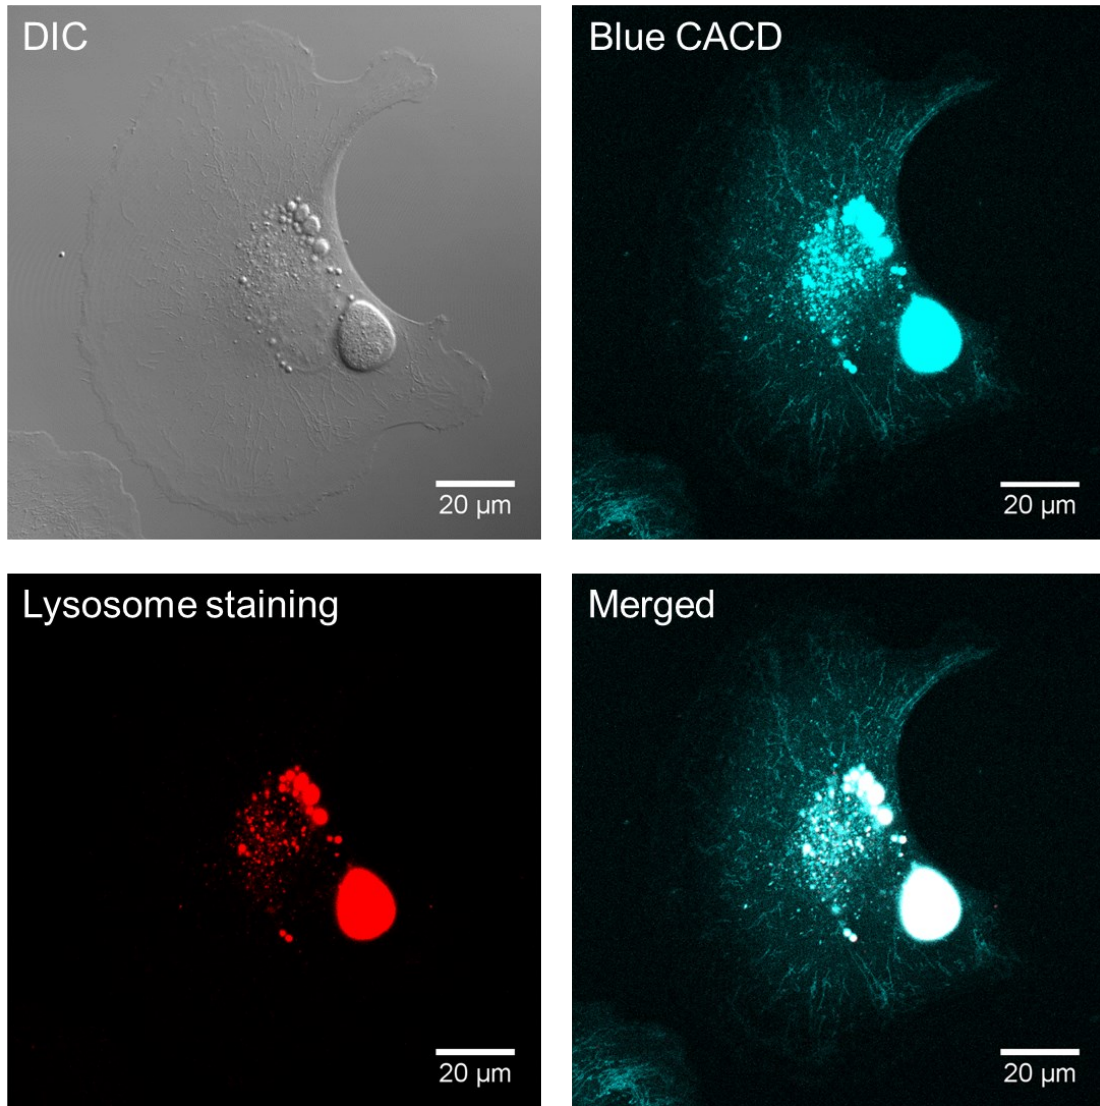

**Figure S18.** Some blue CDs localize in lysosomes upon uptake into trout gill epithelial cells.

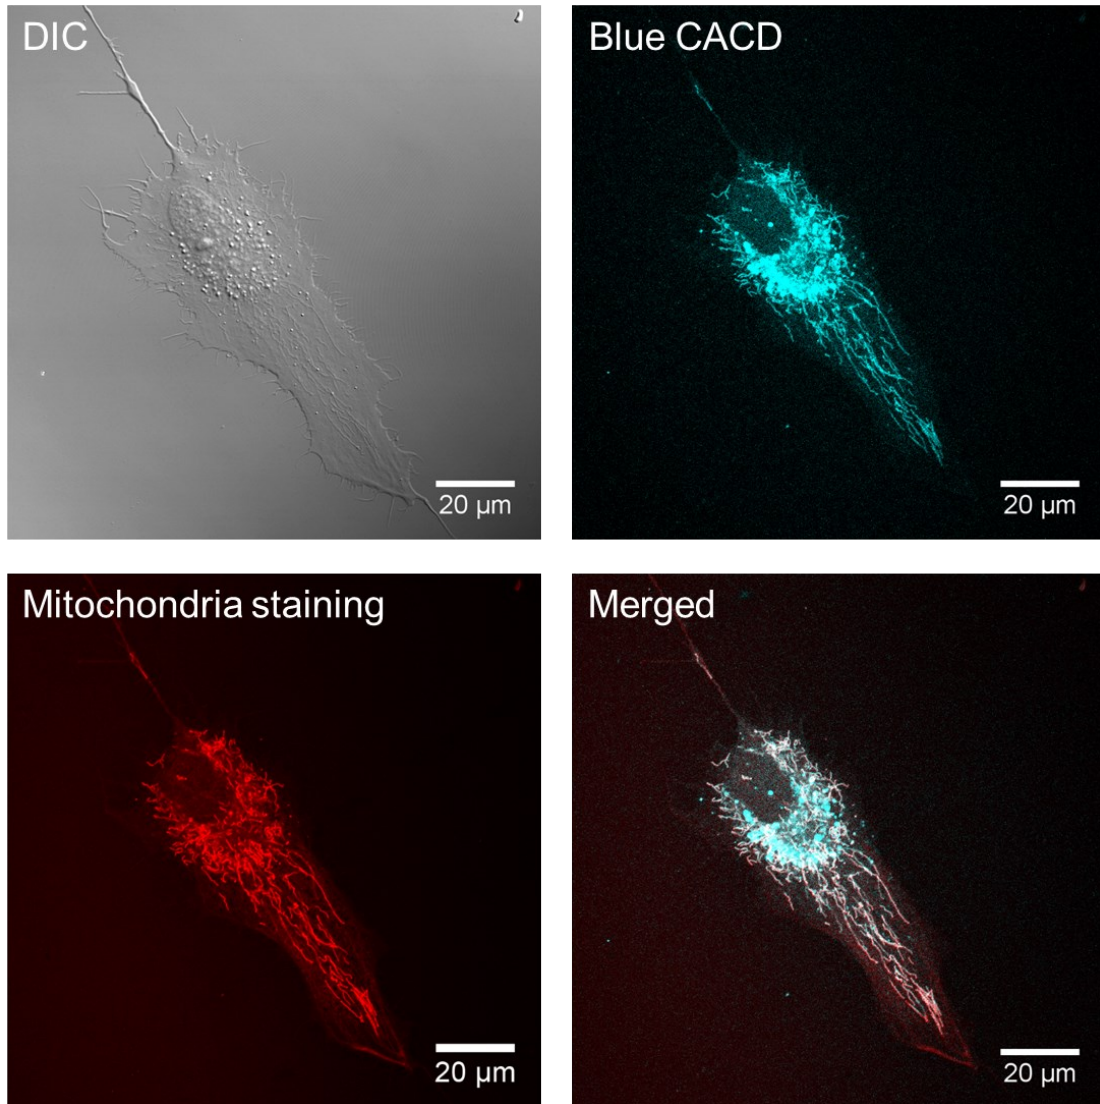

**Figure S19.** Some blue CDs localize with mitochondria upon uptake into trout gill epithelial cells.



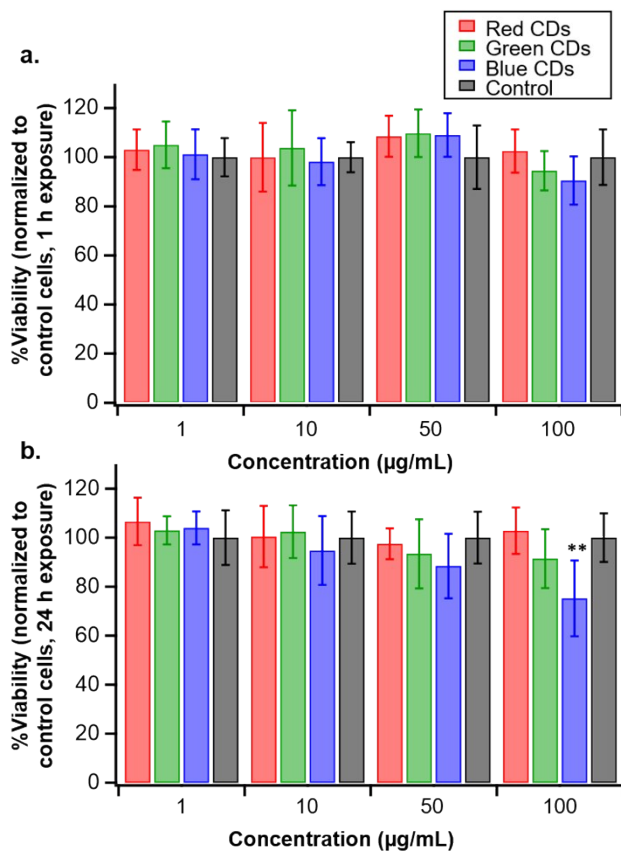

**Figure S20.** Impact of fractionated carbon dots on cell viability. (a) CD-B, CD-G, and CD-R caused no significant decrease in trout gill epithelial cell viability following 1 h exposure to 1, 10, 50, or 100 µg/mL of carbon dots. (b) CD-G and CD-R caused no significant decrease in cell viability following exposure for 24 h at all concentrations studied. CD-B did cause a significant decrease in cell viability following exposure to 100 µg/mL. \*\*,  $p < 0.01$ .

### Exchanges in REMD of citric acid + urea

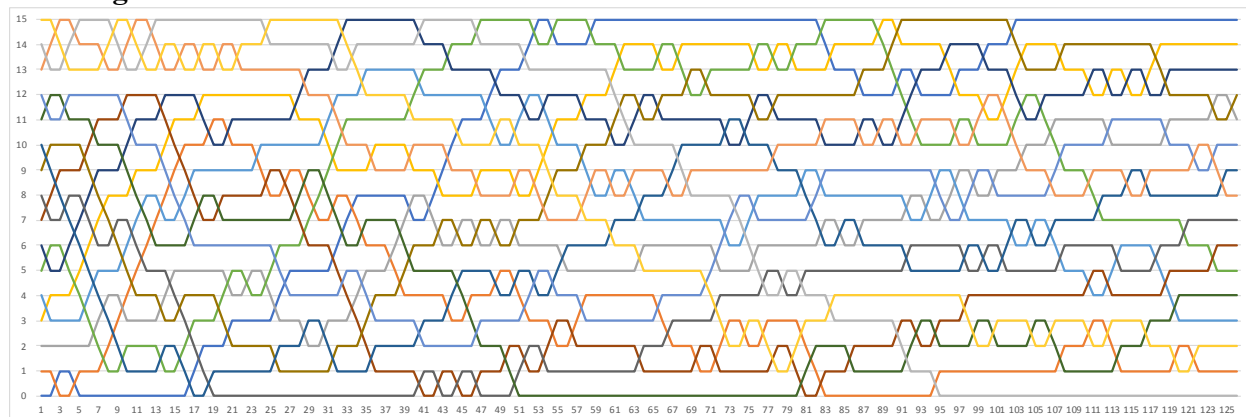

**Figure S21.** Plots of the exchanges among replicas in the REMD simulations for the polyamide decamer formed with citric acid and urea. The vertical axis corresponds to each replica (numbered 0 to 15) and the horizontal axis corresponds to an exchange attempt (exchange is attempted every 1 ps).

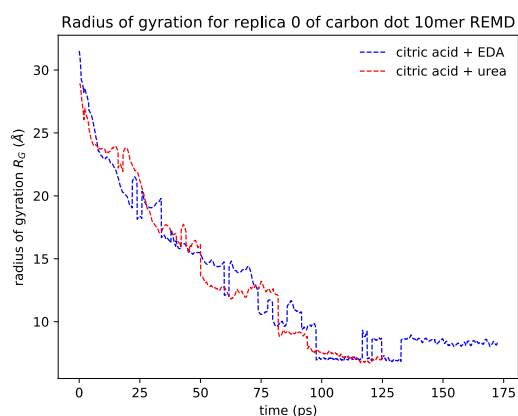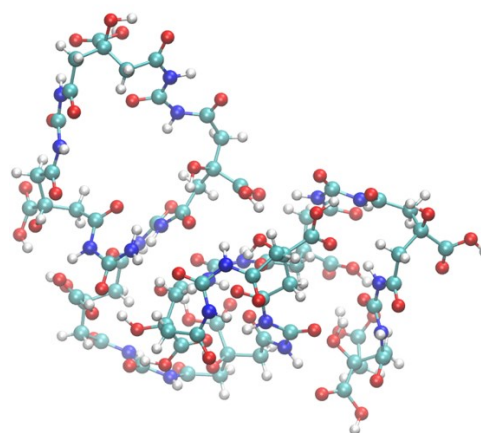

**Figure S22.** Radius of gyration for the replica at 300 K from REMD of the polyamide decamers from citric acid with urea (red). Also shown for comparison (blue) is a profile for the polyamide formed from citric acid with ethylene-diamine (EDA). A structural snapshot is shown on the right.

**Table S1.** XPS atomic percentage of C, N and O of raw products, blue, green and red CD fractions.

|             | C     | N     | O     | N/C  |
|-------------|-------|-------|-------|------|
| Raw product | 59.8% | 17.2% | 23.1% | 0.29 |
| B           | 41.2% | 5.7%  | 47.6% | 0.14 |
| G           | 50.7% | 7.5%  | 39.0% | 0.15 |
| R           | 48.5% | 8.3%  | 40.5% | 0.17 |

CHN elemental analysis of as-made CDs shows the formula is  $C_{6.00}H_6N_{2.06}O_{5.26}$ . It aligns with XPS elemental analysis, though not exactly the same. Other colored fractions were not done CHN elemental analysis due to lack of materials for the test.

**Table S2.** A list of solvents with dielectric constants, Kamlet Taft parameters ( $\alpha$ ,  $\beta$ , and  $\pi^*$ ) and normalized solvent polarity  $E_T^N$ .<sup>3-4</sup>

|          | Dielectric constant | $\alpha$ | $\beta$ | $\pi^*$ | $E_T^N$ |
|----------|---------------------|----------|---------|---------|---------|
| Acetone  | 20.7                | 0.08     | 0.48    | 0.71    | 0.355   |
| DMF      | 36.7                | 0        | 0.69    | 0.88    | 0.386   |
| DMSO     | 46.7                | 0        | 0.76    | 1       | 0.444   |
| Ethanol  | 24.3                | 0.83     | 0.77    | 0.54    | 0.654   |
| Methanol | 32.6                | 0.93     | 0.62    | 0.6     | 0.762   |
| Water    | 80                  | 1.17     | 0.18    | 1.09    | 1       |

**Table S3.** Thermochemistry of small molecule chromophores based on B3LYP-D3/Def2TZVPP calculations following the reaction scheme shown in Figure S10.

|                                   |         | <b>1</b> | <b>2</b> | <b>3</b> |
|-----------------------------------|---------|----------|----------|----------|
| $\Delta H$ (kcal/mol)<br>298.15 K | Step1   | -8.2     | -0.02    | -0.02    |
|                                   | Step2   | 29.8     | 20.9     | 27.5     |
|                                   | Overall | 21.6     | 20.9     | 27.5     |
| $\Delta G$ (kcal/mol)<br>298.15 K | Step1   | -5.9     | 2.0      | 2.0      |
|                                   | Step2   | 9.2      | -1.0     | 6.0      |
|                                   | Overall | 3.3      | 1.0      | 8.0      |
| $\Delta H$ (kcal/mol)<br>473.15 K | Step1   | -8.1     | 0.2      | 0.2      |
|                                   | Step2   | 30.1     | 21.0     | 27.7     |
|                                   | Overall | 22.0     | 21.2     | 27.9     |
| $\Delta G$ (kcal/mol)<br>473.15 K | Step1   | -4.6     | 3.2      | 3.2      |

|  |         |      |       |      |
|--|---------|------|-------|------|
|  | Step2   | -3.0 | -14.0 | -6.7 |
|  | Overall | -7.6 | -10.8 | -3.5 |

**Table S4.** Thermochemistry of polyamide formation from citric acid and urea.

|                                 | Monomer | Monomer Dehydrated | Dimer Dehydrated |
|---------------------------------|---------|--------------------|------------------|
| $\Delta H$ (kcal/mol) @298.15 K | -8.2    | 5.3                | 12.0             |
| $\Delta G$ (kcal/mol) @298.15 K | -5.9    | -4.5               | 3.1              |
| $\Delta H$ (kcal/mol) @473.15 K | -8.1    | 5.6                | 12.6             |
| $\Delta G$ (kcal/mol) @473.15 K | -4.6    | -10.4              | -2.3             |

- a. For structures, see examples in Figure S13. Calculations were carried out at the B3LYP-D3/Def2TZVPP level of theory with harmonic approximations for the entropy calculations.

**Table S5.** TD-DFT results of Product 1 in Figure S10

| Level of theory            | Absorption    |                |        | Emission      |                |        |
|----------------------------|---------------|----------------|--------|---------------|----------------|--------|
|                            | Excited State | $\lambda$ (nm) | $f$    | Excited State | $\lambda$ (nm) | $f$    |
| B3LYP/Def2TZVPP            | 1             | 355.2          | 0.0777 | 1             | 421.8          | 0.0671 |
|                            | 2             | 304.8          | 0.0073 | 2             | 335.3          | 0.0099 |
|                            | 3             | 272.4          | 0.0007 | 3             | 300.7          | 0.0000 |
| $\omega$ B97XD/Def2TZVPP   | 1             | 330.1          | 0.1024 | 1             | 398.9          | 0.0871 |
|                            | 2             | 265.5          | 0.0038 | 2             | 284.1          | 0.0090 |
|                            | 3             | 250.4          | 0.0006 | 3             | 271.0          | 0.0003 |
| $\omega$ B97XD/6-31+G(d,p) | 1             | 330.0          | 0.1106 | 1             | 400.5          | 0.0929 |
|                            | 2             | 265.4          | 0.0044 | 2             | 286.2          | 0.0107 |
|                            | 3             | 251.1          | 0.0007 | 3             | 272.6          | 0.0002 |

**Table S6.** TD-DFT results of Product 2 in Figure S10

| Level of theory            | Absorption    |                |        | Emission      |                |        |
|----------------------------|---------------|----------------|--------|---------------|----------------|--------|
|                            | Excited State | $\lambda$ (nm) | $f$    | Excited State | $\lambda$ (nm) | $f$    |
| B3LYP/Def2TZVPP            | 1             | 369.0          | 0.0001 | 1             | 923.6          | 0.0671 |
|                            | 2             | 342.2          | 0.0001 | 2             | 439.9          | 0.0001 |
|                            | 3             | 290.7          | 0.0295 | 3             | 419.0          | 0.0013 |
| $\omega$ B97XD/6-31+G(d,p) | 1             | 327.7          | 0.0000 | 1             | 562.2          | 0.0000 |
|                            | 2             | 301.0          | 0.0000 | 2             | 347.9          | 0.0001 |
|                            | 3             | 265.4          | 0.0152 | 3             | 332.6          | 0.0022 |

**Table S7.** TD-DFT results of Product **3** in Figure S10

| Level of theory            | Absorption    |                |        | Emission      |                |        |
|----------------------------|---------------|----------------|--------|---------------|----------------|--------|
|                            | Excited State | $\lambda$ (nm) | $f$    | Excited State | $\lambda$ (nm) | $f$    |
| B3LYP/Def2TZVPP            | 1             | 375.7          | 0.0839 | 1             | 437.2          | 0.0716 |
|                            | 2             | 362.0          | 0.0001 | 2             | 387.5          | 0.0001 |
|                            | 3             | 281.2          | 0.0001 | 3             | 299.0          | 0.0000 |
| $\omega$ B97XD/6-31+G(d,p) | 1             | 339.2          | 0.1234 | 1             | 392.9          | 0.1104 |
|                            | 2             | 308.7          | 0.0003 | 2             | 328.9          | 0.0002 |
|                            | 3             | 253.5          | 0.0002 | 3             | 269.8          | 0.0001 |

**Table S8.** Emission (E), oscillator strength ( $f$ ), and nature of the LC-TD-DFTB2 S2→S0 vertical relaxation for the polyamide dimer of citric acid and urea interacting with a small molecule chromophore and for the S1→S0 vertical relaxation calculated with TD- $\omega$ B97XD at the LC-TD-DFTB2 S2 optimized geometry.<sup>a</sup>

| ID | LC-TD-DFTB2 |        |       |                  | TD- $\omega$ B97XD |        |        |                  |
|----|-------------|--------|-------|------------------|--------------------|--------|--------|------------------|
|    | E (eV)      | E (nm) | $f$   | Transition       | E (eV)             | E (nm) | $f$    | Transition       |
| 0  | 3.528       | 351.43 | 0.142 | HOMO-1<br>→ LUMO | 2.883              | 430.01 | 0.1162 | HOMO →<br>LUMO   |
| 1  | 3.647       | 339.96 | 0.112 | HOMO →<br>LUMO   | 2.990              | 414.70 | 0.0864 | HOMO →<br>LUMO   |
| 2  | 3.502       | 354.04 | 0.148 | HOMO →<br>LUMO   | 2.851              | 434.87 | 0.1184 | HOMO →<br>LUMO   |
| 3  | 3.630       | 341.55 | 0.155 | HOMO-1<br>→ LUMO | 3.018              | 410.86 | 0.1182 | HOMO →<br>LUMO   |
| 4  | 3.703       | 334.82 | 0.146 | HOMO →<br>LUMO   | 3.094              | 400.78 | 0.1333 | HOMO →<br>LUMO   |
| 5  | 3.584       | 345.94 | 0.126 | HOMO-2<br>→ LUMO | 3.059              | 405.33 | 0.1021 | HOMO-1<br>→ LUMO |
| 6  | 3.666       | 338.20 | 0.103 | HOMO-1<br>→ LUMO | 3.157              | 392.71 | 0.1091 | HOMO →<br>LUMO   |
| 7  | 4.225       | 293.45 | 0.158 | HOMO-1<br>→ LUMO | 3.065              | 404.55 | 0.1099 | HOMO →<br>LUMO   |
| 8  | 3.339       | 371.32 | 0.127 | HOMO-3           | 2.787              | 444.90 | 0.1059 | HOMO →           |

|   |       |        |       |                  |       |        |        |                |
|---|-------|--------|-------|------------------|-------|--------|--------|----------------|
|   |       |        |       | → LUMO           |       |        |        | LUMO           |
| 9 | 3.547 | 349.55 | 0.125 | HOMO-3<br>→ LUMO | 2.949 | 420.43 | 0.1011 | HOMO →<br>LUMO |

<sup>a</sup> For geometry ID 6, the S3→S0 vertical relaxation is reported.

**Table S9.** Absorption energy (Abs), emission energy (Em), and corresponding oscillator strengths (*f*) and nature of the S0→S1 transition for citric acid and urea polyamide dimer interacting with a small molecule chromophore. All geometries were optimized with (TD-) ωB97XD.

| ID | Abs (eV) | Abs (nm) | <i>f</i> | Transition        | Em (eV) | Em (nm) | <i>f</i> | Transition        |
|----|----------|----------|----------|-------------------|---------|---------|----------|-------------------|
| 0  | 3.713    | 333.95   | 0.135    | HOMO<br>→<br>LUMO | 2.955   | 419.53  | 0.089    | HOMO<br>→<br>LUMO |
| 1  | 3.644    | 340.23   | 0.111    | HOMO<br>→<br>LUMO |         |         |          |                   |
| 2  | 3.688    | 336.17   | 0.126    | HOMO<br>→<br>LUMO | 2.981   | 415.93  | 0.087    | HOMO<br>→<br>LUMO |
| 3  | 3.709    | 334.26   | 0.137    | HOMO<br>→<br>LUMO | 3.009   | 412.10  | 0.096    | HOMO<br>→<br>LUMO |
| 4  | 3.649    | 339.78   | 0.162    | HOMO<br>→<br>LUMO | 3.034   | 408.62  | 0.129    | HOMO<br>→<br>LUMO |

**Table S10.** Emission (E), oscillator strength (f), and nature of the LC-TD-DFTB2 bright vertical relaxation for the decamer of citric acid and urea interacting with the small molecule and for the S1→S0 vertical relaxation calculated with TD-ωB97XD/6-31+G(d) at the LC-TD-DFTB2 S2 optimized geometry.<sup>a</sup>

| ID | LC-TD-DFTB2 |       | TD-ωB97XD |       |
|----|-------------|-------|-----------|-------|
|    | E (nm)      | f     | E (nm)    | f     |
| 0  | 350.8       | 0.094 | 422.6     | 0.076 |
| 1  | 335.5       | 0.110 | 398.2     | 0.095 |
| 2  | 364.6       | 0.111 | 464.9     | 0.071 |
| 3  | 356.2       | 0.125 | 430.3     | 0.097 |
| 4  | 341.1       | 0.130 | 410.6     | 0.104 |
| 5  | 338.6       | 0.110 | 400.7     | 0.100 |
| 6  | 359.8       | 0.115 | 433.0     | 0.082 |
| 7  | 357.7       | 0.078 | 419.1     | 0.068 |
| 8  | 336.1       | 0.121 | ---       | ---   |
| 9  | 345.8       | 0.114 | 414.7     | 0.106 |

**Table S11.** Thermochemistry of the pyrene-based model based on B3LYP-D3/Def2TZVPP calculations

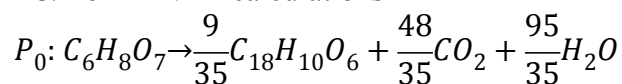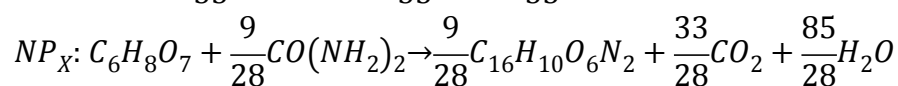

|               | P0    | NP1   | NP2   | NP3   | NP4   |
|---------------|-------|-------|-------|-------|-------|
| ΔH (kcal/mol) | -20.9 | -0.8  | 2.5   | 4.0   | 4.2   |
| ΔG (kcal/mol) | -53.4 | -31.0 | -27.8 | -26.2 | -26.1 |

**Table S12.** TD-DFT results of the pyrene-based model at the TD-  $\omega$ B97XD/6-31+G(d) level of theory <sup>a</sup>

| System     |           | Absorption     |        | Emission       |        |
|------------|-----------|----------------|--------|----------------|--------|
|            |           | $\lambda$ (nm) | $f$    | $\lambda$ (nm) | $f$    |
| P0(S0-S1)  | Gas-phase | 410.2          | 0.1576 | 455.8          | 0.1599 |
|            | Water     | 409.1          | 0.2013 | 474.3          | 0.3518 |
|            | Acetone   | 409.8          | 0.2051 | 473.0          | 0.3365 |
| NP1(S0-S2) | Gas-phase | 440.1          | 0.1171 | 525.2          | 0.0432 |
|            | Water     | 440.6          | 0.2587 | 532.9          | 0.3135 |
|            | Acetone   | 441.1          | 0.2643 | 531.6          | 0.2788 |
| NP2(S0-S2) | Gas-phase | 491.8          | 0.1098 | 614.1          | 0.0629 |
|            | Water     | 477.4          | 0.2123 | 596.7          | 0.272  |
|            | Acetone   | 478.9          | 0.2162 | 597.2          | 0.2493 |
| NP3(S0-S2) | Gas-phase | 488.2          | 0.1379 | 570.4          | 0.0547 |
|            | Water     | 493.6          | 0.2804 | 577.8          | 0.4727 |
|            | Acetone   | 494.0          | 0.286  | 575.3          | 0.4255 |
| NP4(S0-S2) | Gas-phase | 543.4          | 0.1568 | 692.9          | 0.1064 |
|            | Water     | 534.2          | 0.2474 | 706.0          | 0.3095 |
|            | Acetone   | 535.9          | 0.2521 | 704.8          | 0.2918 |

a. For water and acetone, PCM calculations were conducted with the TD-  $\omega$ B97XD/6-31+G(d) level of theory.

**Table S13.** Absorption of NP4 calculated at the TD-  $\omega$ B97XD/6-31+G(d) level of theory.

| Absorption    |                |        |
|---------------|----------------|--------|
| Excited State | $\lambda$ (nm) | $f$    |
| 1             | 1092.0         | 0.0000 |
| 2             | 543.4          | 0.1570 |
| 3             | 459.8          | 0.0372 |
| 4             | 363.8          | 0.4184 |
| 5             | 298.5          | 0.0000 |
| 6             | 275.1          | 1.5608 |
| 7             | 265.2          | 0.0000 |
| 8             | 228.9          | 0.0000 |
| 9             | 217.7          | 0.3397 |
| 10            | 217.2          | 0.0002 |



**Table S14.** Absorption (Abs, in nm), emission (Em, in nm), oscillator strength ( $f$ ), and nature of the S0→S1 transition for the polyamide dimer of citric acid and urea. All geometries are optimized with LC-TD-DFTB2.<sup>a</sup>

| ID | LC-TD-DFTB2 |        |                 | $\omega$ B97XD |        |                 | LC-TD-DFTB2 |        | $\omega$ B97XD |        |
|----|-------------|--------|-----------------|----------------|--------|-----------------|-------------|--------|----------------|--------|
|    | Abs         | $f$    | Transition      | Abs            | $f$    | Transition      | Em          | $f$    | Em             | $f$    |
| 0  | 242.31      | 0.0002 | HOMO → LUMO     | 270.27         | 0.0001 | HOMO → LUMO     | 395.51      | 0.0000 | 425.96         | 0.0000 |
| 1  | 235.41      | 0.0011 | HOMO-1 → LUMO   | 252.12         | 0.0000 | HOMO-1 → LUMO   | 434.55      | 0.0021 | 451.62         | 0.0016 |
| 2  | 240.30      | 0.0020 | HOMO-1 → LUMO   | 256.73         | 0.0003 | HOMO-1 → LUMO   | 407.85      | 0.0010 | 423.41         | 0.0008 |
| 3  | 237.54      | 0.0005 | HOMO-3 → LUMO   | 260.09         | 0.0004 | HOMO-5 → LUMO   | 478.44      | 0.0030 | 515.57         | 0.0020 |
| 4  | 242.12      | 0.0002 | HOMO → LUMO     | 270.24         | 0.0001 | HOMO → LUMO     | 394.49      | 0.0000 | 425.32         | 0.0000 |
| 5  | 233.11      | 0.0004 | HOMO-1 → LUMO+1 | 265.26         | 0.0007 | HOMO-1 → LUMO+2 | 496.40      | 0.0023 | 534.51         | 0.0015 |
| 6  | 234.95      | 0.0006 | HOMO-2 → LUMO+1 | 260.82         | 0.0001 | HOMO-3 → LUMO+1 | 474.55      | 0.0009 | 467.74         | 0.0017 |
| 7  | 244.19      | 0.0002 | HOMO-1 → LUMO   | 267.31         | 0.0005 | HOMO → LUMO     | 535.55      | 0.0000 | 449.19         | 0.0000 |
| 8  | 238.27      | 0.0006 | HOMO-1 → LUMO   | 262.42         | 0.0000 | HOMO → LUMO     | 446.97      | 0.0014 | 475.13         | 0.0013 |
| 9  | 240.59      | 0.0001 | HOMO-1 → LUMO   | 270.87         | 0.0002 | HOMO → LUMO     | 578.00      | 0.0013 | 461.39         | 0.0012 |

a. The basis set used in  $\omega$ B97XD is 6-31+G(d).

**Table S15. TD-DFT results of dehydrated amide: monomer <sup>a</sup>**

| Level of theory                    | Absorption    |                |        | Emission      |                |        |
|------------------------------------|---------------|----------------|--------|---------------|----------------|--------|
|                                    | Excited State | $\lambda$ (nm) | $f$    | Excited State | $\lambda$ (nm) | $f$    |
| B3LYP/6-31+G(d,p)                  | 1             | 334.6          | 0.0000 | 1             | 835.6          | 0.0000 |
|                                    | 2             | 320.3          | 0.0062 | 2             | 691.0          | 0.0069 |
|                                    | 3             | 312.7          | 0.0018 | 3             | 420.7          | 0.0002 |
| $\omega$ B97XD/6-31+G(d,p)         | 1             | 271.0          | 0.0087 | 1             | 1602.2         | 0.0000 |
|                                    | 2             | 246.8          | 0.0092 | 2             | 349.1          | 0.0001 |
|                                    | 3             | 230.4          | 0.0780 | 3             | 328.5          | 0.0001 |
| CAM-B3LYP/6-31+G(d,p) <sup>b</sup> | 1             | 269.6          | 0.0087 | 1             | 1716.4         | 0.0000 |
|                                    | 2             | 244.9          | 0.0088 | 2             | 348.2          | 0.0001 |
|                                    | 3             | 230.3          | 0.0660 | 3             | 335.3          | 0.0001 |
| CAM-B3LYP/6-31+G(d,p) <sup>c</sup> | 1             | 283.3          | 0.0019 | 1             | 444.1          | 0.0000 |
|                                    | 2             | 253.9          | 0.0024 | 2             | 409.3          | 0.0277 |
|                                    | 3             | 242.3          | 0.0671 | 3             | 353.6          | 0.0000 |

a. For structures, see Figure S13.

b. Initial structures are taken from  $\omega$ B97XD/6-31+G(d,p) optimizations.

c. Initial structures are taken from B3LYP/6-31+G(d,p) optimizations.

**Table S16. TD-DFT results of the dehydrated amide: dimer**

| Level of theory            | Absorption    |                |        | Emission      |                |        |
|----------------------------|---------------|----------------|--------|---------------|----------------|--------|
|                            | Excited State | $\lambda$ (nm) | $f$    | Excited State | $\lambda$ (nm) | $f$    |
| $\omega$ B97XD/6-31+G(d,p) | 1             | 273.6          | 0.0056 | 1             | 528.0          | 0.0031 |
|                            | 2             | 259.3          | 0.0125 | 2             | 341.6          | 0.0028 |
|                            | 3             | 250.0          | 0.0104 | 3             | 302.0          | 0.0051 |

**Table S17.** Oscillator strengths,  $f$ , of the first five singlet excitations for the polyamide dimer of citric acid and urea calculated at the ground state geometry optimized with LC-TD-DFTB2.

|    | 0       |                | 1       |                | 2       |                | 3       |                | 4       |                |
|----|---------|----------------|---------|----------------|---------|----------------|---------|----------------|---------|----------------|
|    | LC-DFTB | $\omega$ B97XD |
| S1 | 0.000   | 0.000          | 0.001   | 0.000          | 0.002   | 0.000          | 0.001   | 0.000          | 0.000   | 0.000          |
| S2 | 0.000   | 0.003          | 0.005   | 0.008          | 0.005   | 0.001          | 0.001   | 0.002          | 0.002   | 0.003          |
| S3 | 0.003   | 0.001          | 0.000   | 0.001          | 0.000   | 0.009          | 0.003   | 0.005          | 0.003   | 0.002          |
| S4 | 0.002   | 0.002          | 0.005   | 0.000          | 0.004   | 0.001          | 0.006   | 0.003          | 0.003   | 0.002          |
| S5 | 0.003   | 0.001          | 0.001   | 0.002          | 0.001   | 0.002          | 0.010   | 0.002          | 0.003   | 0.001          |
|    |         |                |         |                |         |                |         |                |         |                |
|    | 5       |                | 6       |                | 7       |                | 8       |                | 9       |                |
|    | LC-DFTB | $\omega$ B97XD |
| S1 | 0.000   | 0.001          | 0.001   | 0.000          | 0.000   | 0.001          | 0.001   | 0.000          | 0.000   | 0.000          |
| S2 | 0.001   | 0.002          | 0.000   | 0.001          | 0.001   | 0.002          | 0.000   | 0.003          | 0.002   | 0.003          |
| S3 | 0.001   | 0.002          | 0.001   | 0.002          | 0.000   | 0.002          | 0.003   | 0.001          | 0.001   | 0.001          |
| S4 | 0.002   | 0.002          | 0.004   | 0.004          | 0.000   | 0.003          | 0.005   | 0.001          | 0.008   | 0.001          |
| S5 | 0.011   | 0.003          | 0.008   | 0.001          | 0.003   | 0.001          | 0.001   | 0.002          | 0.002   | 0.002          |

**Table S18.** Excitation energy (in eV) of the S0→S1 for the polyamide formed from citric acid and ethylene diamine studied in Ref. 1.<sup>a</sup>

| Structure                           | B3LYP | $\omega$ B97XD | CAM-B3LYP | DFTB3 | DFTB2 | LC-DFTB2 |
|-------------------------------------|-------|----------------|-----------|-------|-------|----------|
| Dimer (one chain)                   | 5.182 | 5.690          | 5.670     | 3.925 | 5.780 | 5.996    |
| Dimer (two chain) intramolecular HB | 4.878 | 5.635          | 5.620     | 3.538 | 5.351 | 5.957    |
| Dimer (two chain) intermolecular HB | 5.144 | 5.528          | 5.514     | 4.198 | 5.945 | 5.905    |
| Octamer                             | 4.619 | 5.394          | 5.397     | 3.371 | 4.643 | 5.436    |
| Decamer                             | 4.647 | 5.384          | 5.384     | 3.447 | 4.742 | 5.390    |

<sup>a</sup> For DFT methods, the basis set used was 6-31G(d). For DFTB3, the 3OB parameter set was used. For DFTB2, the OB2/base parameters set was used. The DFTB parameters were obtained from [www.dftb.org](http://www.dftb.org). As shown in Fig. S8, the S1 excitation at the B3LYP level is charge transfer in nature, while the nature of excitation is local when range-separation functionals are used in either TD-DFT or TD-DFTB calculations. Overall, the results of TD-DFTB are in good agreement with  $\omega$ B97XD and CAM-B3LYP once a range-separation functional is used (LC-DFTB2).

## Reference

1. Bhattacharya, D.; Mishra, M. K.; De, G., Carbon Dots from a Single Source Exhibiting Tunable Luminescent Colors through the Modification of Surface Functional Groups in ORMOSIL Films. *J. Phys. Chem. C* **2017**, *121* (50), 28106–28116.
2. Liu, W.; Li, C.; Ren, Y.; Sun, X.; Pan, W.; Li, Y.; Wang, J.; Wang, W., Carbon dots: surface engineering and applications. *J. Mater. Chem. B* **2016**, *4* (35), 5772–5788.
3. Jones, S. S.; Sahatiya, P.; Badhulika, S., One step, high yield synthesis of amphiphilic carbon quantum dots derived from chia seeds: a solvatochromic study. *New J. Chem.* **2017**, *41* (21), 13130–13139.
4. Reichardt, C., Solvatochromic dyes as solvent polarity indicators. *Chem. Rev.* **1994**, *94* (8), 2319–2358.
